# Supplementary material
Source: publisher figshare collection journal article supplement (https://acs.figshare.com/ndownloader/files/4227715)
Supplement: Supplementary file 1 [file 4227715]

 
data_shelxl 
 
_audit_creation_method            SHELXL-97 
_chemical_name_systematic 
; 
 ? 
; 
_chemical_name_common             ? 
_chemical_melting_point           ? 
_chemical_formula_moiety          ? 
_chemical_formula_sum 
 'C112 H176 Cl16 N64' 
_chemical_formula_weight          2986.37 
 
loop_ 
 _atom_type_symbol 
 _atom_type_description 
 _atom_type_scat_dispersion_real 
 _atom_type_scat_dispersion_imag 
 _atom_type_scat_source 
 'C'  'C'   0.0033   0.0016 
 'International Tables Vol C Tables 4.2.6.8 and 6.1.1.4' 
 'H'  'H'   0.0000   0.0000 
 'International Tables Vol C Tables 4.2.6.8 and 6.1.1.4' 
 'Cl'  'Cl'   0.1484   0.1585 
 'International Tables Vol C Tables 4.2.6.8 and 6.1.1.4' 
 'N'  'N'   0.0061   0.0033 
 'International Tables Vol C Tables 4.2.6.8 and 6.1.1.4' 
 
_symmetry_cell_setting            Monoclinic 
_symmetry_space_group_name_H-M    C2/c 
 
loop_ 
 _symmetry_equiv_pos_as_xyz 
 'x, y, z' 
 '-x, y, -z+1/2' 
 'x+1/2, y+1/2, z' 
 '-x+1/2, y+1/2, -z+1/2' 
 '-x, -y, -z' 
 'x, -y, z-1/2' 
 '-x+1/2, -y+1/2, -z' 
 'x+1/2, -y+1/2, z-1/2' 
 
_cell_length_a                    12.516(3) 
_cell_length_b                    24.947(5) 
_cell_length_c                    12.942(3) 
_cell_angle_alpha                 90.00 
_cell_angle_beta                  116.07(3) 
_cell_angle_gamma                 90.00 
_cell_volume                      3629.8(14) 
_cell_formula_units_Z             1 
_cell_measurement_temperature     293(2) 
_cell_measurement_reflns_used     ? 
_cell_measurement_theta_min       ? 
_cell_measurement_theta_max       ? 
 
_exptl_crystal_description        prism 
_exptl_crystal_colour             colourless 
_exptl_crystal_size_max           0.6 
_exptl_crystal_size_mid           0.3 
_exptl_crystal_size_min           0.2 
_exptl_crystal_density_meas       ? 
_exptl_crystal_density_diffrn     1.366 
_exptl_crystal_density_method     'not measured' 
_exptl_crystal_F_000              1568 
_exptl_absorpt_coefficient_mu     0.372 
_exptl_absorpt_correction_type    'multi-scan' 
_exptl_absorpt_correction_T_min   0.7473 
_exptl_absorpt_correction_T_max   1.0000 
_exptl_absorpt_process_details    Crystalclear 
 
_exptl_special_details 
; 
 ? 
; 
 
_diffrn_ambient_temperature       293(2) 
_diffrn_radiation_wavelength      0.71073 
_diffrn_radiation_type            MoK\a 
_diffrn_radiation_source          'fine-focus sealed tube' 
_diffrn_radiation_monochromator   graphite 
_diffrn_measurement_device_type   'Rigaku Saturn 724' 
_diffrn_measurement_method        'omega and phi scans' 
_diffrn_detector_area_resol_mean  ? 
_diffrn_standards_number          ? 
_diffrn_standards_interval_count  ? 
_diffrn_standards_interval_time   ? 
_diffrn_standards_decay_%         ? 
_diffrn_reflns_number             14382 
_diffrn_reflns_av_R_equivalents   0.0445 
_diffrn_reflns_av_sigmaI/netI     0.0379 
_diffrn_reflns_limit_h_min        -14 
_diffrn_reflns_limit_h_max        14 
_diffrn_reflns_limit_k_min        -21 
_diffrn_reflns_limit_k_max        29 
_diffrn_reflns_limit_l_min        -13 
_diffrn_reflns_limit_l_max        15 
_diffrn_reflns_theta_min          3.05 
_diffrn_reflns_theta_max          25.00 
_reflns_number_total              3194 
_reflns_number_gt                 2966 
_reflns_threshold_expression      >2sigma(I) 
 
_computing_data_collection        Crystalclear 
_computing_cell_refinement        Crystalclear 
_computing_data_reduction         Crystalclear 
_computing_structure_solution     'SHELXS-97 (Sheldrick, 1990)' 
_computing_structure_refinement   'SHELXL-97 (Sheldrick, 1997)' 
_computing_molecular_graphics     Shelxtl 
_computing_publication_material   'Shelxtl and Mercury' 
 
_refine_special_details 
; 
 Refinement of F^2^ against ALL reflections.  The weighted R-factor wR and 
 goodness of fit S are based on F^2^, conventional R-factors R are based 
 on F, with F set to zero for negative F^2^. The threshold expression of 
 F^2^ > 2sigma(F^2^) is used only for calculating R-factors(gt) etc. and is 
 not relevant to the choice of reflections for refinement.  R-factors based 
 on F^2^ are statistically about twice as large as those based on F, and R- 
 factors based on ALL data will be even larger. 
; 
 
_refine_ls_structure_factor_coef  Fsqd  
_refine_ls_matrix_type            full 
_refine_ls_weighting_scheme       calc  
_refine_ls_weighting_details 
 'calc w=1/[\s^2^(Fo^2^)+(0.0449P)^2^+1.3741P] where P=(Fo^2^+2Fc^2^)/3' 
_atom_sites_solution_primary      direct 
_atom_sites_solution_secondary    difmap 
_atom_sites_solution_hydrogens    geom 
_refine_ls_hydrogen_treatment     constr 
_refine_ls_extinction_method      none 
_refine_ls_extinction_coef        ? 
_refine_ls_number_reflns          3194 
_refine_ls_number_parameters      219 
_refine_ls_number_restraints      0 
_refine_ls_R_factor_all           0.0450 
_refine_ls_R_factor_gt            0.0399 
_refine_ls_wR_factor_ref          0.1015 
_refine_ls_wR_factor_gt           0.0980 
_refine_ls_goodness_of_fit_ref    1.144 
_refine_ls_restrained_S_all       1.144 
_refine_ls_shift/su_max           0.066 
_refine_ls_shift/su_mean          0.010 
 
loop_ 
 _atom_site_label 
 _atom_site_type_symbol 
 _atom_site_fract_x 
 _atom_site_fract_y 
 _atom_site_fract_z 
 _atom_site_U_iso_or_equiv 
 _atom_site_adp_type 
 _atom_site_occupancy 
 _atom_site_symmetry_multiplicity 
 _atom_site_calc_flag 
 _atom_site_refinement_flags 
 _atom_site_disorder_assembly 
 _atom_site_disorder_group 
N1 N 0.38171(14) 0.21727(6) -0.04356(14) 0.0204(4) Uani 1 1 d . . . 
H1 H 0.3521 0.2245 -0.1158 0.024 Uiso 1 1 calc R . . 
N2 N 0.54768(15) 0.22800(7) 0.13149(14) 0.0250(4) Uani 1 1 d . . . 
H2A H 0.6199 0.2386 0.1698 0.030 Uiso 1 1 calc R . . 
H2B H 0.5099 0.2142 0.1668 0.030 Uiso 1 1 calc R . . 
N3 N 0.55243(16) 0.25410(7) -0.03626(15) 0.0267(4) Uani 1 1 d . . . 
H3A H 0.6247 0.2648 0.0017 0.032 Uiso 1 1 calc R . . 
H3B H 0.5175 0.2572 -0.1099 0.032 Uiso 1 1 calc R . . 
N10 N 0.33983(15) 0.18365(6) 0.10495(14) 0.0211(4) Uani 1 1 d . . . 
C8 C 0.26330(18) 0.15863(8) 0.13543(18) 0.0234(5) Uani 1 1 d . . . 
H8 H 0.2872 0.1531 0.2135 0.028 Uiso 1 1 calc R . . 
C9 C 0.15126(18) 0.14036(8) 0.05986(18) 0.0230(5) Uani 1 1 d . . . 
C10 C 0.11921(18) 0.14834(8) -0.05668(18) 0.0245(5) Uani 1 1 d . . . 
H10 H 0.0456 0.1365 -0.1115 0.029 Uiso 1 1 calc R . . 
C12 C 0.30519(17) 0.19084(7) -0.00743(17) 0.0191(4) Uani 1 1 d . . . 
C13 C 0.07088(19) 0.11362(9) 0.1028(2) 0.0306(5) Uani 1 1 d . . . 
H13A H -0.0043 0.1059 0.0389 0.046 Uiso 1 1 calc R . . 
H13B H 0.0588 0.1370 0.1555 0.046 Uiso 1 1 calc R . . 
H13C H 0.1068 0.0809 0.1413 0.046 Uiso 1 1 calc R . . 
C16 C 0.49486(18) 0.23289(7) 0.01884(18) 0.0203(5) Uani 1 1 d . . . 
C18 C 0.19545(18) 0.17358(8) -0.09106(18) 0.0237(5) Uani 1 1 d . . . 
H18 H 0.1743 0.1791 -0.1687 0.028 Uiso 1 1 calc R . . 
N5 N 0.33046(15) 0.01077(7) 1.12206(15) 0.0273(4) Uani 1 1 d . . . 
H5A H 0.3014 -0.0053 1.1628 0.033 Uiso 1 1 calc R . . 
H5B H 0.4041 0.0201 1.1527 0.033 Uiso 1 1 calc R . . 
N6 N 0.14857(15) 0.00670(7) 0.96566(15) 0.0278(4) Uani 1 1 d . . . 
H6A H 0.1196 -0.0094 1.0065 0.033 Uiso 1 1 calc R . . 
H6B H 0.1039 0.0134 0.8943 0.033 Uiso 1 1 calc R . . 
N7 N 0.30333(15) 0.04643(7) 0.94622(14) 0.0234(4) Uani 1 1 d . . . 
H7 H 0.2521 0.0514 0.8760 0.028 Uiso 1 1 calc R . . 
N11 N 0.50470(15) 0.05542(6) 1.07805(15) 0.0233(4) Uani 1 1 d . . . 
C2 C 0.61331(19) 0.07451(8) 1.10022(18) 0.0261(5) Uani 1 1 d . . . 
H2 H 0.6752 0.0669 1.1719 0.031 Uiso 1 1 calc R . . 
C3 C 0.64006(19) 0.10459(8) 1.02486(19) 0.0252(5) Uani 1 1 d . . . 
C4 C 0.54630(19) 0.11477(8) 0.91754(19) 0.0271(5) Uani 1 1 d . . . 
H4 H 0.5594 0.1347 0.8634 0.033 Uiso 1 1 calc R . . 
C6 C 0.41802(18) 0.06598(8) 0.97472(17) 0.0220(5) Uani 1 1 d . . . 
C14 C 0.7634(2) 0.12529(9) 1.0573(2) 0.0359(6) Uani 1 1 d . . . 
H14A H 0.7703 0.1611 1.0865 0.054 Uiso 1 1 calc R . . 
H14B H 0.7785 0.1253 0.9907 0.054 Uiso 1 1 calc R . . 
H14C H 0.8203 0.1026 1.1154 0.054 Uiso 1 1 calc R . . 
C15 C 0.26218(18) 0.02113(8) 1.01278(18) 0.0235(5) Uani 1 1 d . . . 
C17 C 0.43427(19) 0.09546(8) 0.89129(18) 0.0258(5) Uani 1 1 d . . . 
H17 H 0.3711 0.1019 0.8198 0.031 Uiso 1 1 calc R . . 
Cl1 Cl 0.18618(5) 0.26877(2) 0.30326(4) 0.03032(17) Uani 1 1 d . . . 
Cl2 Cl 0.12929(5) 0.04360(2) 0.68793(4) 0.03251(18) Uani 1 1 d . . . 
 
loop_ 
 _atom_site_aniso_label 
 _atom_site_aniso_U_11 
 _atom_site_aniso_U_22 
 _atom_site_aniso_U_33 
 _atom_site_aniso_U_23 
 _atom_site_aniso_U_13 
 _atom_site_aniso_U_12 
N1 0.0204(9) 0.0251(9) 0.0142(8) 0.0026(7) 0.0063(7) 0.0002(7) 
N2 0.0183(9) 0.0382(11) 0.0177(9) 0.0029(8) 0.0070(8) -0.0044(8) 
N3 0.0244(9) 0.0360(10) 0.0210(10) 0.0030(8) 0.0110(8) -0.0017(8) 
N10 0.0216(9) 0.0225(9) 0.0206(9) 0.0005(7) 0.0104(8) -0.0013(7) 
C8 0.0263(11) 0.0240(11) 0.0216(11) 0.0005(9) 0.0122(9) -0.0024(9) 
C9 0.0225(10) 0.0184(10) 0.0303(12) -0.0002(9) 0.0137(9) 0.0026(9) 
C10 0.0188(10) 0.0227(11) 0.0265(11) -0.0023(9) 0.0050(9) -0.0016(9) 
C12 0.0200(10) 0.0159(10) 0.0212(10) -0.0001(8) 0.0089(9) 0.0034(8) 
C13 0.0268(12) 0.0322(13) 0.0349(13) -0.0001(10) 0.0154(10) -0.0059(10) 
C16 0.0208(10) 0.0188(10) 0.0231(11) 0.0007(8) 0.0113(9) 0.0032(8) 
C18 0.0234(11) 0.0242(11) 0.0194(10) -0.0010(9) 0.0057(9) -0.0004(9) 
N5 0.0220(9) 0.0360(11) 0.0197(9) 0.0027(8) 0.0053(8) -0.0034(8) 
N6 0.0213(9) 0.0336(10) 0.0243(10) 0.0012(8) 0.0062(8) -0.0015(8) 
N7 0.0213(9) 0.0283(10) 0.0159(9) 0.0017(7) 0.0038(7) 0.0013(7) 
N11 0.0223(9) 0.0229(9) 0.0219(9) -0.0013(7) 0.0072(8) 0.0018(7) 
C2 0.0235(11) 0.0247(11) 0.0247(11) -0.0024(9) 0.0055(9) 0.0009(9) 
C3 0.0266(11) 0.0214(11) 0.0289(12) -0.0057(9) 0.0133(10) 0.0007(9) 
C4 0.0331(12) 0.0240(11) 0.0283(12) -0.0009(9) 0.0171(10) 0.0042(10) 
C6 0.0233(11) 0.0195(10) 0.0218(11) -0.0039(8) 0.0087(9) 0.0040(8) 
C14 0.0317(13) 0.0365(13) 0.0416(14) -0.0021(11) 0.0180(11) -0.0048(11) 
C15 0.0244(11) 0.0207(10) 0.0230(11) -0.0029(9) 0.0082(9) 0.0038(9) 
C17 0.0272(11) 0.0285(12) 0.0190(11) 0.0001(9) 0.0077(9) 0.0042(9) 
Cl1 0.0220(3) 0.0510(4) 0.0189(3) 0.0034(2) 0.0098(2) 0.0047(2) 
Cl2 0.0227(3) 0.0486(4) 0.0213(3) -0.0038(2) 0.0052(2) 0.0029(2) 
 
_geom_special_details 
; 
 All esds (except the esd in the dihedral angle between two l.s. planes) 
 are estimated using the full covariance matrix.  The cell esds are taken 
 into account individually in the estimation of esds in distances, angles 
 and torsion angles; correlations between esds in cell parameters are only 
 used when they are defined by crystal symmetry.  An approximate (isotropic) 
 treatment of cell esds is used for estimating esds involving l.s. planes. 
; 
 
loop_ 
 _geom_bond_atom_site_label_1 
 _geom_bond_atom_site_label_2 
 _geom_bond_distance 
 _geom_bond_site_symmetry_2 
 _geom_bond_publ_flag 
N1 C16 1.343(3) . ? 
N1 C12 1.401(3) . ? 
N1 H1 0.8600 . ? 
N2 C16 1.315(3) . ? 
N2 H2A 0.8600 . ? 
N2 H2B 0.8600 . ? 
N3 C16 1.326(3) . ? 
N3 H3A 0.8600 . ? 
N3 H3B 0.8600 . ? 
N10 C12 1.335(3) . ? 
N10 C8 1.340(3) . ? 
C8 C9 1.388(3) . ? 
C8 H8 0.9300 . ? 
C9 C10 1.394(3) . ? 
C9 C13 1.502(3) . ? 
C10 C18 1.370(3) . ? 
C10 H10 0.9300 . ? 
C12 C18 1.392(3) . ? 
C13 H13A 0.9600 . ? 
C13 H13B 0.9600 . ? 
C13 H13C 0.9600 . ? 
C18 H18 0.9300 . ? 
N5 C15 1.317(3) . ? 
N5 H5A 0.8600 . ? 
N5 H5B 0.8600 . ? 
N6 C15 1.327(3) . ? 
N6 H6A 0.8600 . ? 
N6 H6B 0.8600 . ? 
N7 C15 1.340(3) . ? 
N7 C6 1.403(3) . ? 
N7 H7 0.8600 . ? 
N11 C6 1.326(3) . ? 
N11 C2 1.347(3) . ? 
C2 C3 1.383(3) . ? 
C2 H2 0.9300 . ? 
C3 C4 1.392(3) . ? 
C3 C14 1.503(3) . ? 
C4 C17 1.376(3) . ? 
C4 H4 0.9300 . ? 
C6 C17 1.393(3) . ? 
C14 H14A 0.9600 . ? 
C14 H14B 0.9600 . ? 
C14 H14C 0.9600 . ? 
C17 H17 0.9300 . ? 
 
loop_ 
 _geom_angle_atom_site_label_1 
 _geom_angle_atom_site_label_2 
 _geom_angle_atom_site_label_3 
 _geom_angle 
 _geom_angle_site_symmetry_1 
 _geom_angle_site_symmetry_3 
 _geom_angle_publ_flag 
C16 N1 C12 129.08(17) . . ? 
C16 N1 H1 115.5 . . ? 
C12 N1 H1 115.5 . . ? 
C16 N2 H2A 120.0 . . ? 
C16 N2 H2B 120.0 . . ? 
H2A N2 H2B 120.0 . . ? 
C16 N3 H3A 120.0 . . ? 
C16 N3 H3B 120.0 . . ? 
H3A N3 H3B 120.0 . . ? 
C12 N10 C8 116.85(18) . . ? 
N10 C8 C9 125.26(19) . . ? 
N10 C8 H8 117.4 . . ? 
C9 C8 H8 117.4 . . ? 
C8 C9 C10 115.90(19) . . ? 
C8 C9 C13 121.26(19) . . ? 
C10 C9 C13 122.84(19) . . ? 
C18 C10 C9 120.43(19) . . ? 
C18 C10 H10 119.8 . . ? 
C9 C10 H10 119.8 . . ? 
N10 C12 C18 122.88(19) . . ? 
N10 C12 N1 118.98(17) . . ? 
C18 C12 N1 118.15(18) . . ? 
C9 C13 H13A 109.5 . . ? 
C9 C13 H13B 109.5 . . ? 
H13A C13 H13B 109.5 . . ? 
C9 C13 H13C 109.5 . . ? 
H13A C13 H13C 109.5 . . ? 
H13B C13 H13C 109.5 . . ? 
N2 C16 N3 120.38(19) . . ? 
N2 C16 N1 121.53(19) . . ? 
N3 C16 N1 118.09(18) . . ? 
C10 C18 C12 118.67(19) . . ? 
C10 C18 H18 120.7 . . ? 
C12 C18 H18 120.7 . . ? 
C15 N5 H5A 120.0 . . ? 
C15 N5 H5B 120.0 . . ? 
H5A N5 H5B 120.0 . . ? 
C15 N6 H6A 120.0 . . ? 
C15 N6 H6B 120.0 . . ? 
H6A N6 H6B 120.0 . . ? 
C15 N7 C6 129.23(18) . . ? 
C15 N7 H7 115.4 . . ? 
C6 N7 H7 115.4 . . ? 
C6 N11 C2 116.51(19) . . ? 
N11 C2 C3 125.2(2) . . ? 
N11 C2 H2 117.4 . . ? 
C3 C2 H2 117.4 . . ? 
C2 C3 C4 116.3(2) . . ? 
C2 C3 C14 121.8(2) . . ? 
C4 C3 C14 121.9(2) . . ? 
C17 C4 C3 120.2(2) . . ? 
C17 C4 H4 119.9 . . ? 
C3 C4 H4 119.9 . . ? 
N11 C6 C17 123.6(2) . . ? 
N11 C6 N7 119.02(19) . . ? 
C17 C6 N7 117.43(18) . . ? 
C3 C14 H14A 109.5 . . ? 
C3 C14 H14B 109.5 . . ? 
H14A C14 H14B 109.5 . . ? 
C3 C14 H14C 109.5 . . ? 
H14A C14 H14C 109.5 . . ? 
H14B C14 H14C 109.5 . . ? 
N5 C15 N6 119.9(2) . . ? 
N5 C15 N7 122.10(19) . . ? 
N6 C15 N7 117.99(19) . . ? 
C4 C17 C6 118.2(2) . . ? 
C4 C17 H17 120.9 . . ? 
C6 C17 H17 120.9 . . ? 
 
loop_ 
 _geom_torsion_atom_site_label_1 
 _geom_torsion_atom_site_label_2 
 _geom_torsion_atom_site_label_3 
 _geom_torsion_atom_site_label_4 
 _geom_torsion 
 _geom_torsion_site_symmetry_1 
 _geom_torsion_site_symmetry_2 
 _geom_torsion_site_symmetry_3 
 _geom_torsion_site_symmetry_4 
 _geom_torsion_publ_flag 
C12 N10 C8 C9 -0.8(3) . . . . ? 
N10 C8 C9 C10 1.3(3) . . . . ? 
N10 C8 C9 C13 -178.82(19) . . . . ? 
C8 C9 C10 C18 -0.9(3) . . . . ? 
C13 C9 C10 C18 179.19(19) . . . . ? 
C8 N10 C12 C18 -0.1(3) . . . . ? 
C8 N10 C12 N1 179.41(16) . . . . ? 
C16 N1 C12 N10 7.5(3) . . . . ? 
C16 N1 C12 C18 -173.00(19) . . . . ? 
C12 N1 C16 N2 -5.3(3) . . . . ? 
C12 N1 C16 N3 175.34(18) . . . . ? 
C9 C10 C18 C12 0.2(3) . . . . ? 
N10 C12 C18 C10 0.4(3) . . . . ? 
N1 C12 C18 C10 -179.12(17) . . . . ? 
C6 N11 C2 C3 1.1(3) . . . . ? 
N11 C2 C3 C4 -1.0(3) . . . . ? 
N11 C2 C3 C14 178.8(2) . . . . ? 
C2 C3 C4 C17 0.3(3) . . . . ? 
C14 C3 C4 C17 -179.5(2) . . . . ? 
C2 N11 C6 C17 -0.5(3) . . . . ? 
C2 N11 C6 N7 179.09(17) . . . . ? 
C15 N7 C6 N11 6.4(3) . . . . ? 
C15 N7 C6 C17 -174.01(19) . . . . ? 
C6 N7 C15 N5 0.0(3) . . . . ? 
C6 N7 C15 N6 179.53(19) . . . . ? 
C3 C4 C17 C6 0.3(3) . . . . ? 
N11 C6 C17 C4 -0.1(3) . . . . ? 
N7 C6 C17 C4 -179.74(18) . . . . ? 
 
_diffrn_measured_fraction_theta_max    0.997 
_diffrn_reflns_theta_full              25.00 
_diffrn_measured_fraction_theta_full   0.997 
_refine_diff_density_max    0.208 
_refine_diff_density_min   -0.245 
_refine_diff_density_rms    0.050 
